Anesthesiology  
60:266, 1984

*In reply:* Drs. Solomons and Masson question our methods. One of us (UG) has been working for several years with *in vitro* cell systems and is aware of the fragility of platelets and their metabolism. We paid great attention to their handling and performed many controls to avoid artifacts. Most of the quality controls of our technique have been described under "Experimental Procedures" and "Results" of our article but are mentioned for completeness again here.

1. Platelets of an MH-susceptible patient and one control subject always were tested simultaneously in order to depict even small differences in technique.

2. Dose and time dependency of halothane on platelets as well as its reversibility by dantrolene were used to detect minor changes between control and MH-susceptible patients.

3. Each platelet preparation and treatment group assay were performed in duplicate, showing very reproducible results.

4. EDTA was added at the end of the incubation according to Rao *et al.*<sup>1</sup> and others, although its deletion appeared not to influence our results.

5. In order to get complete recovery of nucleotides from platelets and not to have destruction (tested by the addition of nucleotide standards), the mixing and sonication time as well as strength were chosen carefully. It is understandable that the sonication step needs to be optimized in any laboratory according to the instrument used.

6. Immediate freezing of platelets before extraction of nucleotides was done as previously described by Rao *et al.*<sup>1</sup> The "cold stress" must have been minimal, since extraction and analysis of nucleotides from unfrozen platelets did not change the nucleotide levels significantly.

7. Complete recovery of adenosine nucleotides was achieved with the described extraction procedure (*i.e.*, no nucleotides were found upon further extractions).

8. Our ATP, ADP, and AMP levels in platelets were comparable to values derived with different techniques

in various other laboratories as discussed in our publication.

9. The use of external standards as we did (linearity between 0.2–20 nmol of nucleotides) is a well-accepted technique. The standard deoxyuridine or adenine added after incubation, as published in Solomons and Masson's abstract,<sup>2</sup> does not assure complete recovery of endogenous nucleotides from platelets.

10. We and other laboratories have used this platelet model but were unable to reproduce the preliminary reports of Solomons *et al.*<sup>2–4</sup> that have not yet been published as an original full article.

We, therefore, conclude that our methods are reliable. We await a noninvasive technique to diagnose MH susceptibility that can be reproduced in many centers.

URS GIGER, D.V.M.  
Department of Medical Sciences

RICHARD F. KAPLAN, M.D.  
Assistant Professor of Anesthesiology

Department of Anesthesiology  
University of Florida College of Medicine  
Box J-254, J. Hillis Miller Health Center  
Gainesville, Florida 32610

#### REFERENCES

1. Rao GHR, White JG, Jachimowicz AA, Witkop CJ: Nucleotide profiles of normal and abnormal platelets by high pressure liquid chromatography. *J Lab Clin Med* 84:839–850, 1974
2. Solomons CC, Masson NC: A platelet–halothane bioassay for malignant hyperthermia. *ANESTHESIOLOGY* 57:A225, 1982
3. Solomons CC, McDermott N, Mahowald M: Screening for malignant hyperthermia with a platelet bioassay (letter). *N Engl J Med* 303:642, 1980
4. Mahowald MC, Masson NC, Solomons CC: Regulation of dantrolene pretreatment in malignant hyperthermia susceptible patients using a platelet bioassay. *ANESTHESIOLOGY* 57:A226, 1982

(Accepted for publication August 26, 1983.)

Anesthesiology  
60:266–267, 1984

### Catheter Doubling in Left Main Pulmonary Artery

*To the Editor:*—The balloon-tipped (Swan–Ganz®) pulmonary artery catheter usually is inserted percutaneously<sup>1–3</sup> via the jugular (IJV, EJV), subclavian (SCV), or antecubital vein. In adults, the distal end of the catheter

is in the pulmonary artery (PA) at a distance of 40–45 cm from the percutaneous insertion site when inserted via IJV and SCV. The pulmonary artery usually can be occluded at a distance of 50–55 cm. We have observed

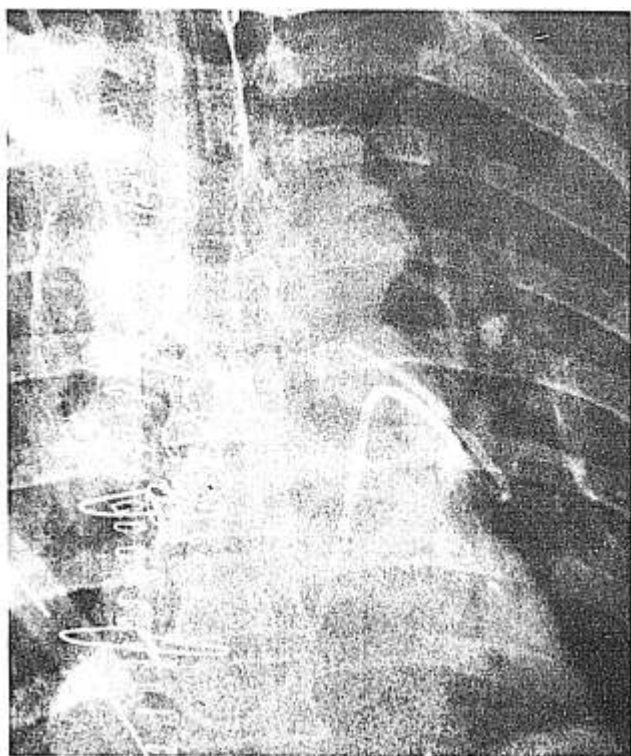

FIG. 1. Photograph of chest x-ray (centered on cardiac silhouette) showing PA catheter doubling in left PA.

doubling of the catheter (bending on itself) more often when the catheter floats into the left rather than right main PA (fig. 1).

To determine the incidence of catheter doubling and a potential risk for knotting, we reviewed chest x-rays of 217 patients who had cardiac surgery during the last 6 months of 1982. All these patients had a 7F, triple lumen thermistor PA catheter (Edwards; Santa Ana, California) placed via the right IJV. The distal end of the catheter as determined by chest x-ray was in the right PA in 88% (191 patients), main PA in 3%, and left PA in 9% (19 patients). Doubling of the catheter characterized by the distal tip bending over itself to point towards the main PA was seen in 68% (13 patients) when the catheter floated into left PA and only in 1.5% (three patients) when it floated to right PA.

The reason for the increased incidence of doubling when the catheter enters the left PA is not known. We speculate that the more vertical and acute downward course of the left lower lobe PA may cause the catheter to double on itself. Doubling can be suspected when an occlusion pressure (PAOP) is not obtainable despite insertion of the catheter to at least 55 cm (with a functioning balloon). Advancing the catheter in the presence of doubling could result in formation of loops in the right ventricle, knotting in PA, or exaggeration of the doubling loop with pulmonary valve insufficiency. We recommend, that, if PAOP cannot be obtained after insertion of the catheter to 55 cm via IJV or SCV, the catheter should be withdrawn into the right ventricle after balloon deflation and refloated following balloon inflation.

SUSAN W. WILSON, M.D.

*Resident*

*Department of Anesthesia*

S. S. MOORTHY, M.D.

*Associate Professor*

*Department of Anesthesia*

YOUSUF MAHOMED, M.D.

*Assistant Professor*

*Department of Cardiovascular Surgery*

VERNON A. VIX, M.D.

*Professor*

*Department of Radiology*

*Indiana University School of Medicine*

*Fesler Hall 204, 1120 South Drive*

*Indianapolis, Indiana 46223*

#### REFERENCES

1. Civetta JM, Gabel JC: Flow directed-pulmonary artery catheterization in surgical patients: Indications and modifications of technic. *Ann Surg* 176:753-756, 1972
2. Swan HJC, Ganz W: Use of balloon flotation catheters in critically ill patients. *Surg Clin North Am* 55:501-520, 1975
3. Rodman GH, Civetta JM: Bedside pulmonary artery catheterization. Simplification of technique. *Arch Surg* 109:840-841, 1974

(Accepted for publication August 26, 1983.)
